# Supplementary material for: Laser co-ablation of bismuth antimony telluride and diamond-like carbon nanocomposites for enhanced thermoelectric performance
Source: Royal Society of Chemistry journal article supplement (doi:10.1039/c7ta08701b), 2017-12-06
Supplement: c7ta08701b1.pdf [file c7ta08701b1.pdf]

## Supplementary information

### Laser co-ablation of bismuth antimony telluride and diamond-like carbon nanocomposites for enhanced thermoelectric performance

Tsung-Han Chen, Po-Hung Chen and Chun-Hua Chen\*

*Department of Materials Science and Engineering, National Chiao Tung University,  
1001 Ta-Hsueh Rd., Hsin-Chu, 30010 Taiwan, ROC.*

\*Corresponding authors: Chun-Hua Chen, [chunhuachen@mail.nctu.edu.tw](mailto:chunhuachen@mail.nctu.edu.tw)

Table S1 Estimated grain sizes using full width at half maximum (FWHM) of some selected XRD peaks

| BST                    | (015)           | (0015)          |
|------------------------|-----------------|-----------------|
| Deposition temperature | Grain size (nm) | Grain size (nm) |
| 400 °C                 | 47.8            | 74.9            |
| 500 °C                 | 117.8           | 63.2            |
| 600 °C                 | 134.9           | 80.6            |
| BST:DLC                | (015)           | (0015)          |
| Deposition temperature | Grain size (nm) | Grain size (nm) |
| 400 °C                 | 43.3            | 21.5            |
| 500 °C                 | 51.0            | 28.3            |
| 600 °C                 | 89.9            | 47.5            |

Table S2 Energy dispersive X-ray spectroscopy (EDX) characterization

| BST:DLC | at % |      |      |      |
|---------|------|------|------|------|
|         | Bi   | Sb   | Te   | C    |
| 400 °C  | 5.0  | 14.7 | 28.5 | 51.7 |
| 500 °C  | 5.0  | 15.5 | 28.9 | 50.5 |
| 600 °C  | 4.7  | 19.0 | 31.6 | 44.7 |

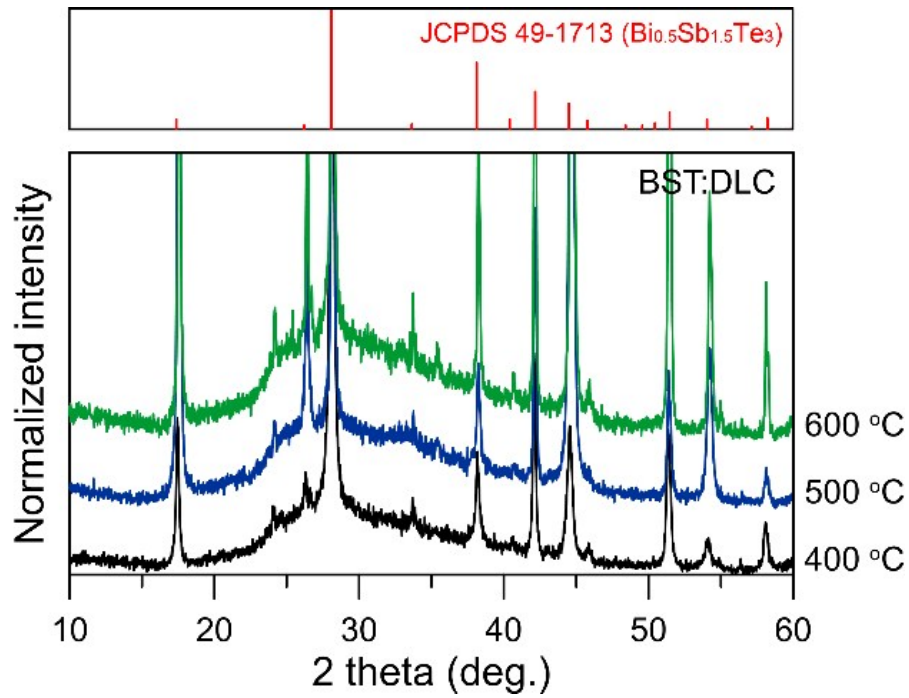

Fig. S1 The XRD patterns clearly displaying the extremely broadening diffraction peak around  $2\theta=24^{\circ}$ - $26^{\circ}$  which can be indexed as (002) of DLC (carbon).

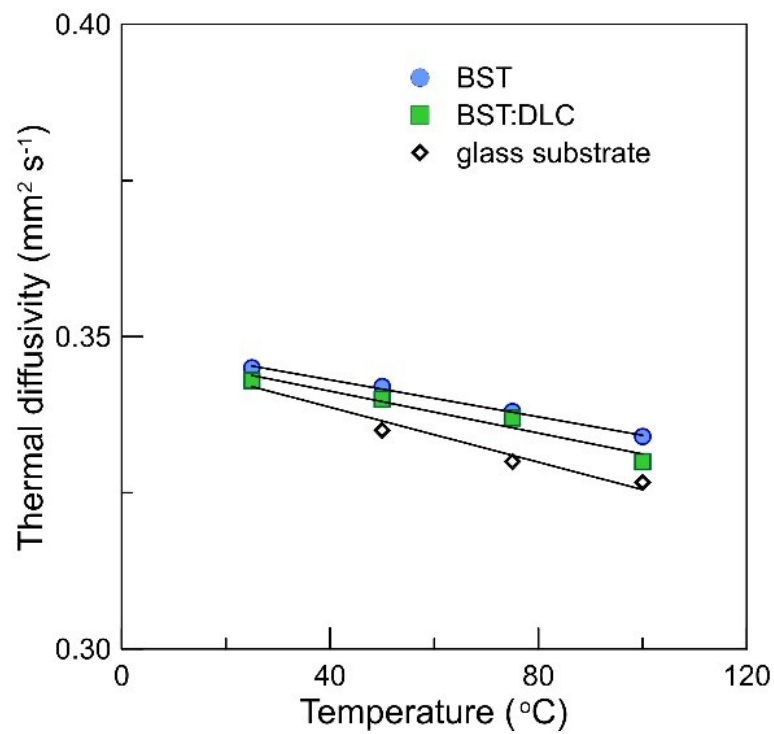

Fig. S2 Temperature dependent thermal diffusivities obtained from the BST and BST:DLC films deposited at 500 °C on glass substrates.
